# Supplementary material
Source: PubMed Central journal article supplement (PMC7610951)

## **SUPPLEMENTAL MATERIAL**

### **BMI and arterial stiffness are associated with greater beat-to-beat blood pressure variability after TIA or minor stroke**

Alastair JS Webb, Amy Lawson, Sara Mazzucco, Linxin Li, Peter M Rothwell, for the Oxford Vascular Study Phenotyped Cohort

**Affiliations:** † Wolfson Centre for Prevention of Stroke and Dementia, University of Oxford, UK

**Supplementary Figure I. Associations between indices of mean BP and BP variability.** Scatter plots with loess-smoothed regression lines, histograms with density curves and r values for the linear associations are presented for mean, standard deviation (SD), coefficient of variation (CV) and residual CV after de-trending of data (rCV), for both systolic (SBP) and diastolic (DBP) blood pressure.

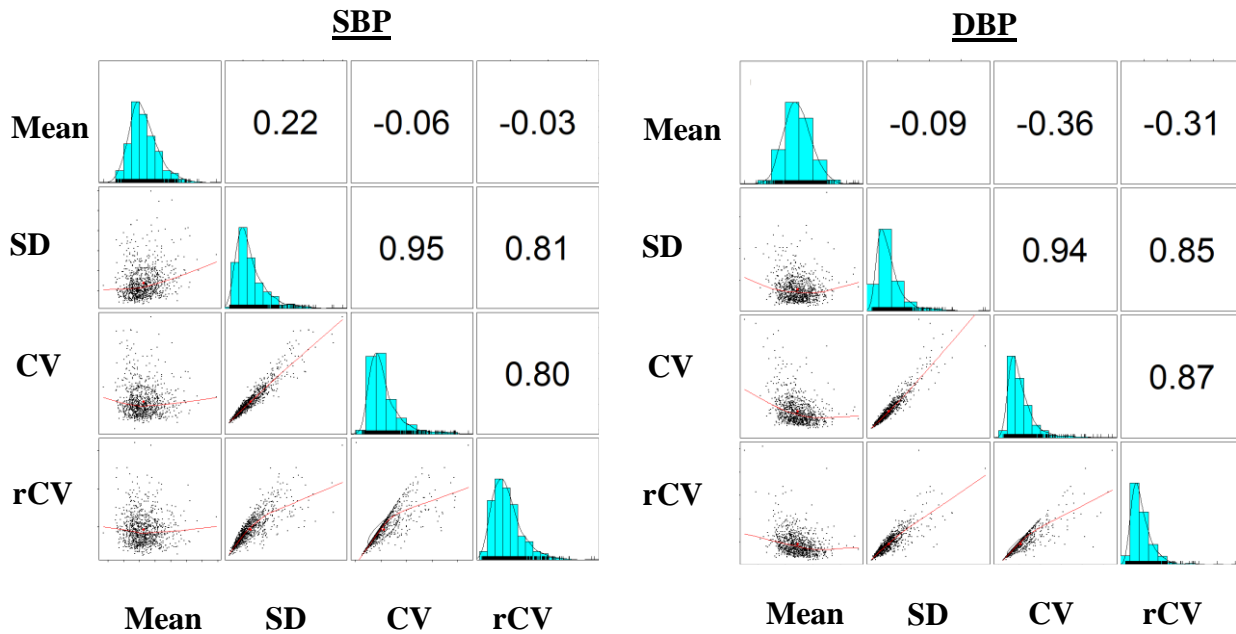

**Supplementary Table I. Linear models for baseline demographic measures and diastolic blood pressure (SBP) level and variability.** DBP variability is analysed as the residual coefficient of variation (rCV), unadjusted or adjusted (adj) for age and sex, or for age, sex and cardiovascular risk factors (CV-RFs). Independent variables include hypertension (HTN) reported by patients at baseline, or defined by patient report and current treatment at baseline. Current treatment and pulse wave velocity measures are given at the time of the physiological assessment. p-val – p value; LDL – low density lipoprotein; HDL – high density lipoprotein; TSH – thyroid stimulating hormone; BMI – body mass index.

|                     | Unadjusted |        | Mean DBP<br>Adj. Age+Sex |        | Adj CV-RFs |        | Unadjusted |        | DBP rCV<br>Adj. Age+Sex |       | Adj CV-RFs |        |
|---------------------|------------|--------|--------------------------|--------|------------|--------|------------|--------|-------------------------|-------|------------|--------|
|                     | $\beta$    | p-val  | $\beta$                  | p-val  | $\beta$    | p-val  | $\beta$    | p-val  | $\beta$                 | p-val | $\beta$    | p-val  |
| Age                 | -0.11      | <0.001 | -0.1                     | <0.001 | -0.11      | <0.001 | 0.01       | 0.156  | 0.01                    | 0.186 | 0.02       | 0.03   |
| Female              | -4.38      | <0.001 | -4.2                     | <0.001 | -4.29      | <0.001 | 0.26       | 0.121  | 0.24                    | 0.144 | 0.21       | 0.224  |
| HTN Reported        | 0.96       | 0.144  | 1.93                     | 0.004  | 2.42       | 0.002  | 0.06       | 0.697  | 0                       | 0.997 | 0.17       | 0.412  |
| HTN Treated         | -0.4       | 0.599  | 0.67                     | 0.394  | 1.19       | 0.145  | -0.16      | 0.409  | -0.26                   | 0.19  | -0.19      | 0.367  |
| Diabetes            | -1.2       | 0.242  | -1.57                    | 0.114  | -1.59      | 0.116  | -0.05      | 0.839  | -0.03                   | 0.894 | 0.05       | 0.86   |
| Dyslipidaemia       |            |        |                          |        |            |        |            |        |                         |       |            |        |
| - Reported          | -0.75      | 0.292  | -0.67                    | 0.34   | -0.39      | 0.605  | -0.19      | 0.288  | -0.22                   | 0.228 | -0.13      | 0.496  |
| - Treated           | -1.32      | 0.116  | -0.93                    | 0.263  | -1.05      | 0.229  | -0.34      | 0.101  | -0.4                    | 0.062 | -0.4       | 0.077  |
| Smoking             |            |        |                          |        |            |        |            |        |                         |       |            |        |
| - Ever              | 0.91       | 0.17   | 0.01                     | 0.99   | -0.14      | 0.843  | -0.08      | 0.637  | -0.03                   | 0.882 | -0.08      | 0.66   |
| - Current           | 1.83       | 0.038  | 0.27                     | 0.759  | 0.43       | 0.662  | 0.1        | 0.666  | 0.23                    | 0.323 | 0.3        | 0.234  |
| Height              | 15.68      | 0.258  | 8.84                     | 0.516  | 8.74       | 0.522  | -10.81     | 0.002  | -10.17                  | 0.004 | -10.07     | 0.004  |
| Weight              | 0.02       | 0.112  | 0                        | 0.681  | 0          | 0.826  | 0          | 0.591  | 0                       | 0.263 | 0          | 0.192  |
| BMI                 | 0.09       | 0.179  | 0.05                     | 0.396  | 0.08       | 0.246  | 0.03       | 0.116  | 0.03                    | 0.066 | 0.04       | 0.018  |
| SBP at 1 month      | 0.16       | <0.001 | 0.17                     | <0.001 | 0.17       | <0.001 | 0          | 0.707  | 0                       | 0.706 | 0          | 0.552  |
| DBP at 1 month      | 0.39       | <0.001 | 0.38                     | <0.001 | 0.38       | <0.001 | -0.02      | 0.013  | -0.02                   | 0.012 | -0.02      | 0.028  |
| Creatinine          | 0          | 0.894  | -0.03                    | 0.056  | -0.03      | 0.059  | 0          | 0.721  | 0                       | 0.37  | 0.01       | 0.294  |
| Cholesterol         | 0.2        | 0.345  | 0.35                     | 0.088  | 0.31       | 0.141  | -0.01      | 0.92   | -0.01                   | 0.799 | -0.01      | 0.843  |
| LDL                 | -0.01      | 0.501  | 0                        | 0.679  | 0          | 0.658  | 0          | 0.545  | 0                       | 0.484 | 0          | 0.562  |
| HDL                 | -0.58      | 0.375  | 1.17                     | 0.076  | 1.22       | 0.069  | -0.04      | 0.825  | -0.18                   | 0.298 | -0.21      | 0.233  |
| TSH                 | 0.22       | 0.236  | 0.24                     | 0.17   | 0.26       | 0.148  | -0.04      | 0.362  | -0.04                   | 0.341 | -0.04      | 0.37   |
| On antihypertensive | -1.08      | 0.15   | 0.05                     | 0.953  | -4.97      | 0.039  | -0.09      | 0.629  | -0.2                    | 0.32  | 0.5        | 0.424  |
| On statin           | -1.47      | 0.067  | -1.04                    | 0.186  | -1.4       | 0.475  | -0.4       | 0.045  | -0.46                   | 0.025 | -0.78      | 0.122  |
| Pulse Wave Velocity | 0.15       | 0.32   | 0.57                     | 0.001  | 0.66       | <0.001 | 0.13       | <0.001 | 0.14                    | 0.002 | 0.16       | <0.002 |

**Supplementary Table II. Difference in SBP and SBP variability values according to dichotomised groups, unadjusted and adjusted for age, sex and cardiovascular risk factors.** Mean values are presented by demographic group, including for hypertension (HTN) reported by patients at baseline, or defined by patient report and current treatment at baseline. Differences in mean level according to treatment at the time of the physiological assessment are given. ACE – angiotensin converting enzyme; ARB – angiotensin receptor blocker; CCB – calcium channel blocker.

|                     | Mean SBP (mmHg) |       | Unadjusted SBP Max (mmHg) |     | SBP rCV (%) |     | Mean SBP (mmHg) |       | Adjusted SBP Max (mmHg) |     | SBP rCV (%) |     |
|---------------------|-----------------|-------|---------------------------|-----|-------------|-----|-----------------|-------|-------------------------|-----|-------------|-----|
|                     | No              | Yes   | No                        | Yes | No          | Yes | No              | Yes   | No                      | Yes | No          | Yes |
| Sex                 | 125.3           | 125.8 | 6.3                       | 7.6 | 4.5         | 4.8 | 127.5           | 127.4 | 7.2                     | 8.4 | 4.9         | 5.2 |
| Diabetes            | 125.3           | 127   | 6.8                       | 7.7 | 4.6         | 4.9 | 127.6           | 127.3 | 7.3                     | 8.2 | 4.8         | 5.2 |
| Ever Smoked         | 125.6           | 125.5 | 7.1                       | 6.7 | 4.6         | 4.6 | 128.1           | 126.8 | 8                       | 7.6 | 5           | 5   |
| Current Smoker      | 125.6           | 125.1 | 6.9                       | 6.8 | 4.6         | 4.8 | 125.6           | 129.3 | 7.3                     | 8.2 | 4.8         | 5.2 |
| HTN reported        | 121.7           | 129.6 | 6.5                       | 7.3 | 4.6         | 4.6 | 124.5           | 130.3 | 7.6                     | 7.9 | 5.1         | 5   |
| HTN Treated         | 121.7           | 126.8 | 6.5                       | 7   | 4.7         | 4.6 | 125.9           | 128.1 | 7.9                     | 7.7 | 5.2         | 5   |
| Dyslipid Treated    | 124.3           | 125.8 | 6.9                       | 6.9 | 4.7         | 4.6 | 128.4           | 126.5 | 8.1                     | 7.5 | 5.2         | 4.9 |
| On antihypertensive | 122.4           | 126.6 | 6.6                       | 7   | 4.6         | 4.6 | 126.5           | 127.9 | 7.9                     | 7.6 | 5.1         | 4.9 |
| On statin           | 124.6           | 125.8 | 7.1                       | 6.8 | 4.8         | 4.6 | 127.3           | 126.9 | 8.4                     | 6.9 | 5.3         | 4.7 |
| On alpha blocker    | 125.2           | 129   | 6.9                       | 6.9 | 4.6         | 4.3 | 127.3           | 128.4 | 7.7                     | 7.5 | 5           | 4.6 |
| On ACE inhibitor    | 125.4           | 125.6 | 7.0                       | 6.7 | 4.6         | 4.6 | 127.6           | 127.1 | 7.9                     | 7.4 | 5           | 5   |
| On ARB              | 124.8           | 130.8 | 6.8                       | 7.5 | 4.6         | 4.5 | 126.8           | 130.9 | 7.7                     | 7.7 | 5.1         | 4.8 |
| On CCB              | 123.5           | 128   | 6.6                       | 7.3 | 4.6         | 4.6 | 126.4           | 128.7 | 7.6                     | 7.8 | 5.1         | 4.9 |
| On diuretic         | 125.4           | 125.7 | 6.9                       | 6.8 | 4.6         | 4.6 | 127.5           | 127.3 | 7.8                     | 7.5 | 5           | 5   |
| On beta-blocker     | 125.4           | 126.7 | 6.8                       | 7.2 | 4.6         | 4.7 | 127.5           | 127.1 | 7.7                     | 7.6 | 5           | 5   |

**Supplementary Table III. Difference in SBP and SBP variability values according to dichotomised groups, unadjusted and adjusted for age, sex and cardiovascular risk factors.** Mean values are presented by demographic group, including for hypertension (HTN) reported by patients at baseline, or defined by patient report and current treatment at baseline. Differences in mean level according to treatment at the time of the physiological assessment are given. ACE – angiotensin converting enzyme; ARB – angiotensin receptor blocker; CCB – calcium channel blocker.

|                     | Mean DBP |      | Unadjusted DBP Max |     | DBP rCV |     | Mean DBP |      | Adjusted DBP Max |     | DBP rCV |     |
|---------------------|----------|------|--------------------|-----|---------|-----|----------|------|------------------|-----|---------|-----|
|                     | No       | Yes  | No                 | Yes | No      | Yes | No       | Yes  | No               | Yes | No      | Yes |
| Sex                 | 70.9     | 66.6 | 4.9                | 5.8 | 4.4     | 4.7 | 70.6     | 66.3 | 5.4              | 6.2 | 4.7     | 4.9 |
| Diabetes            | 69.1     | 67.9 | 5.3                | 5.7 | 4.6     | 4.5 | 69.5     | 67.4 | 5.6              | 6.1 | 4.8     | 4.8 |
| Ever Smoked         | 68.5     | 69.4 | 5.5                | 5.2 | 4.6     | 4.5 | 68.6     | 68.3 | 6                | 5.7 | 4.9     | 4.8 |
| Current Smoker      | 68.6     | 70.5 | 5.3                | 5.2 | 4.5     | 4.6 | 68.2     | 68.7 | 5.6              | 6   | 4.7     | 5   |
| HTN reported        | 68.5     | 69.4 | 5.2                | 5.5 | 4.5     | 4.6 | 67.3     | 69.6 | 5.8              | 5.9 | 4.8     | 4.8 |
| HTN Treated         | 69.3     | 68.9 | 5.3                | 5.3 | 4.7     | 4.5 | 67.7     | 68.8 | 5.9              | 5.7 | 4.9     | 4.7 |
| Dyslipid Treated    | 70       | 68.7 | 5.5                | 5.3 | 4.8     | 4.5 | 69       | 67.9 | 6                | 5.7 | 5       | 4.6 |
| On antihypertensive | 69.8     | 68.7 | 5.3                | 5.3 | 4.6     | 4.5 | 68.2     | 68.7 | 5.9              | 5.7 | 4.9     | 4.7 |
| On statin           | 70.1     | 68.7 | 5.5                | 5.3 | 4.9     | 4.5 | 68.9     | 67.8 | 6.3              | 5.2 | 5.1     | 4.4 |
| On alpha blocker    | 69.1     | 68   | 5.3                | 5.2 | 4.6     | 4.2 | 68.7     | 67.1 | 5.8              | 5.7 | 4.8     | 4.4 |
| On ACE inhibitor    | 69       | 68.9 | 5.4                | 5.2 | 4.5     | 4.6 | 68.5     | 68.6 | 5.9              | 5.6 | 4.7     | 4.8 |
| On ARB              | 69       | 68.6 | 5.3                | 5.4 | 4.6     | 4.4 | 68.3     | 69.5 | 5.8              | 5.5 | 4.8     | 4.6 |
| On CCB              | 69.6     | 68.1 | 5.1                | 5.5 | 4.5     | 4.6 | 68.7     | 68.3 | 5.6              | 5.9 | 4.7     | 4.9 |
| On diuretic         | 68.9     | 69.2 | 5.4                | 5.2 | 4.6     | 4.5 | 68.3     | 68.9 | 5.8              | 5.6 | 4.8     | 4.8 |
| On beta-blocker     | 69.4     | 66   | 5.3                | 5.8 | 4.5     | 4.8 | 68.9     | 66.5 | 5.7              | 6   | 4.7     | 5   |

**Supplementary Figure II. Mean values of mean, maximum and rCV for systolic (SBP) and diastolic (DBP) blood pressure, stratified by sex and quintiles of BMI. Results are presented as the mean and confidence interval for each group. rCV is calculated as the coefficient of variation of de-trended recordings. Y-axes are scaled to the inter-quartile range of the whole population for each index.**

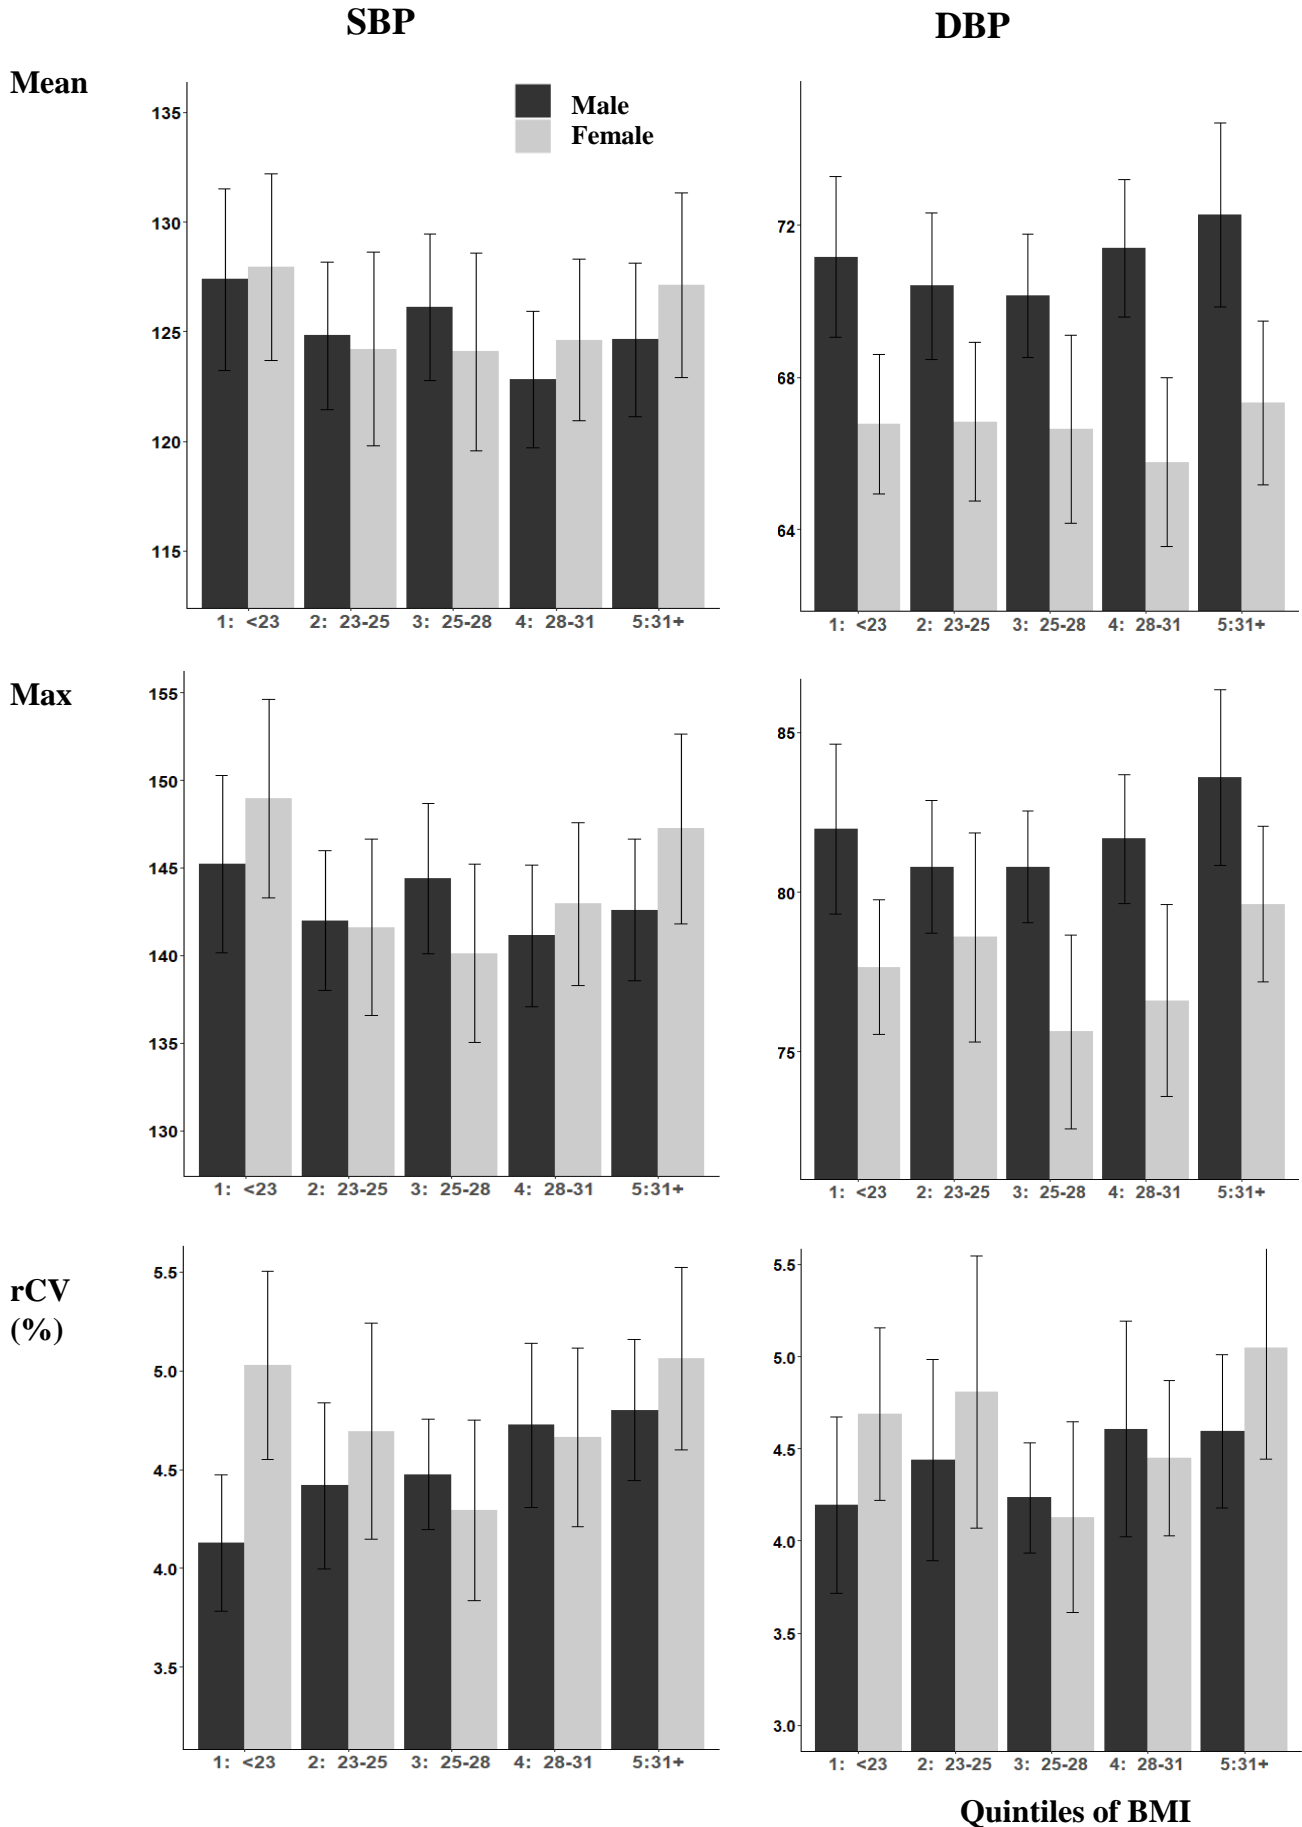

**Supplementary Figure III. Mean values of rCV for systolic (SBP) and diastolic (DBP) blood pressure, stratified by sex and quintiles of height, weight and BMI. Results are presented as the mean and confidence interval for each group. rCV is calculated as the coefficient of variation of de-trended recordings.**

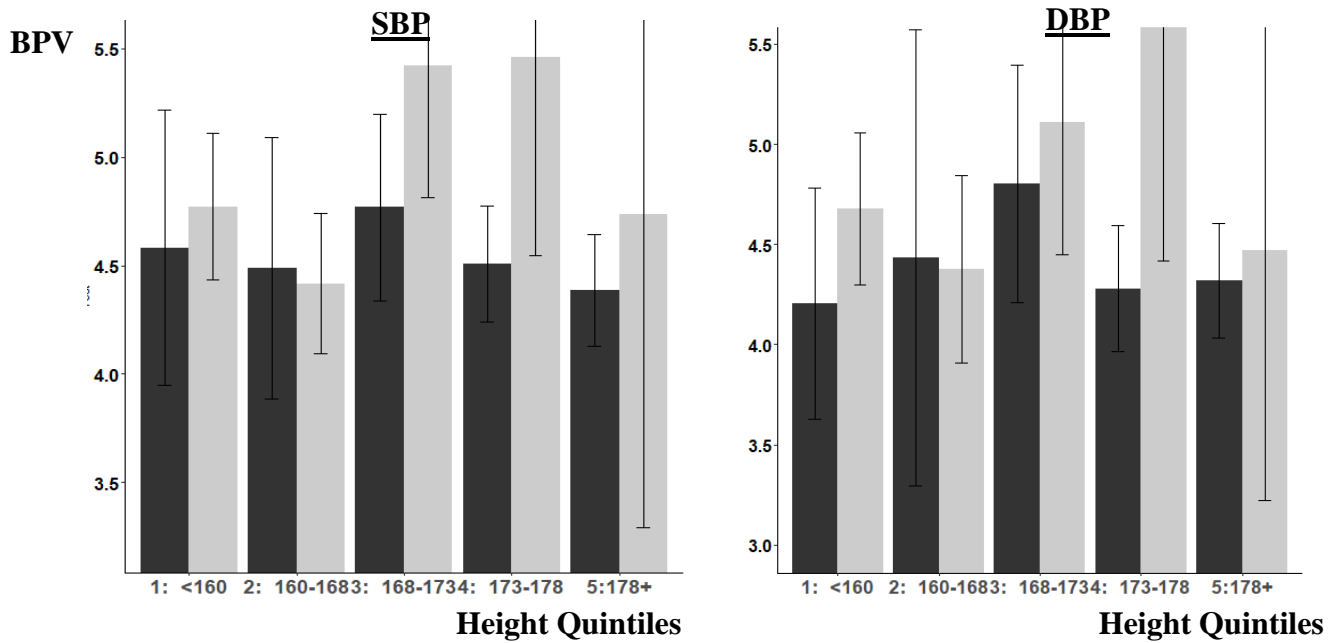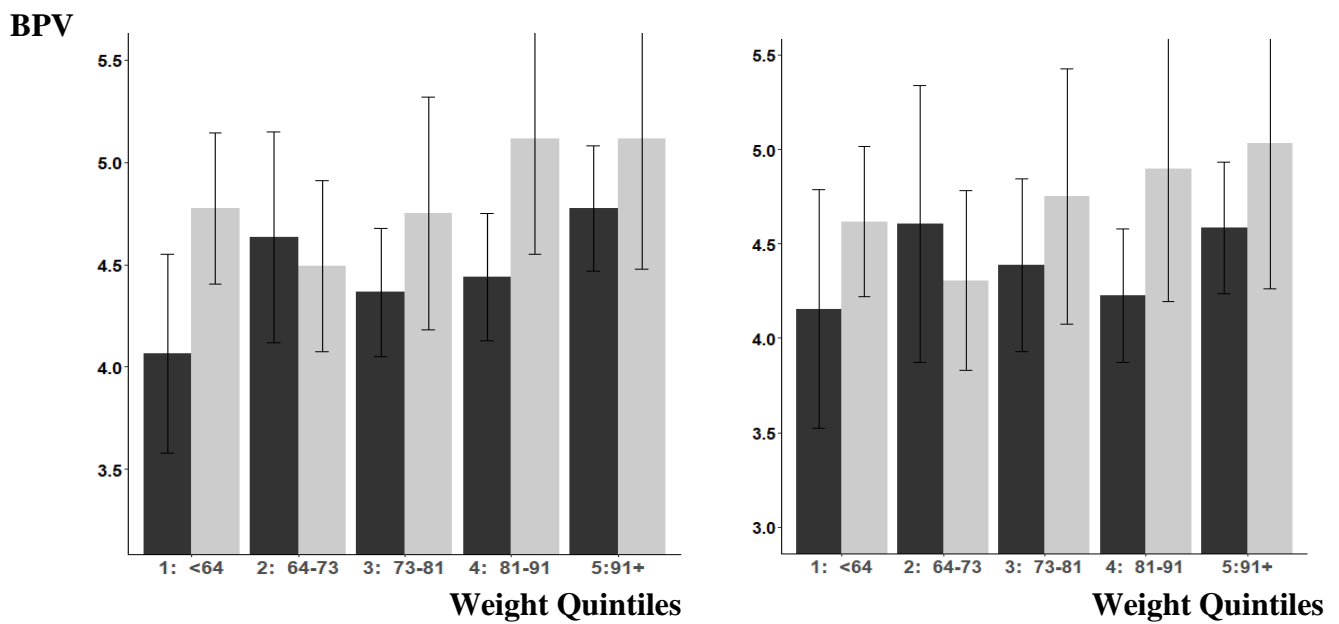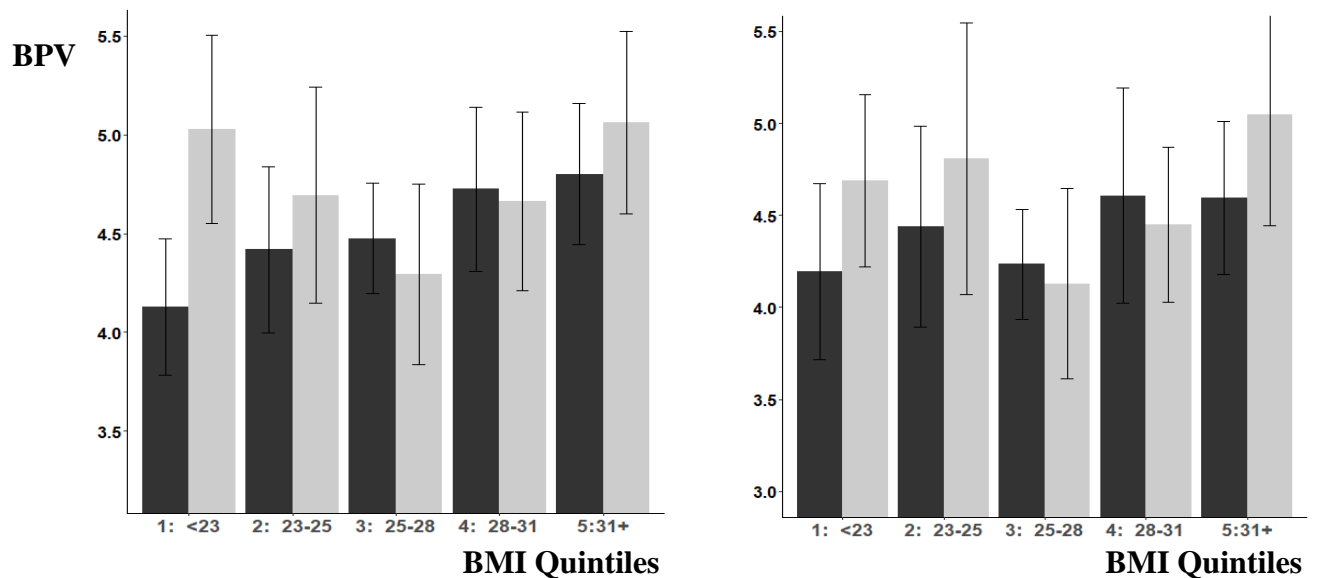

Supplementary Figure IV. Distributions of systolic rCV stratified by BMI category and Sex.

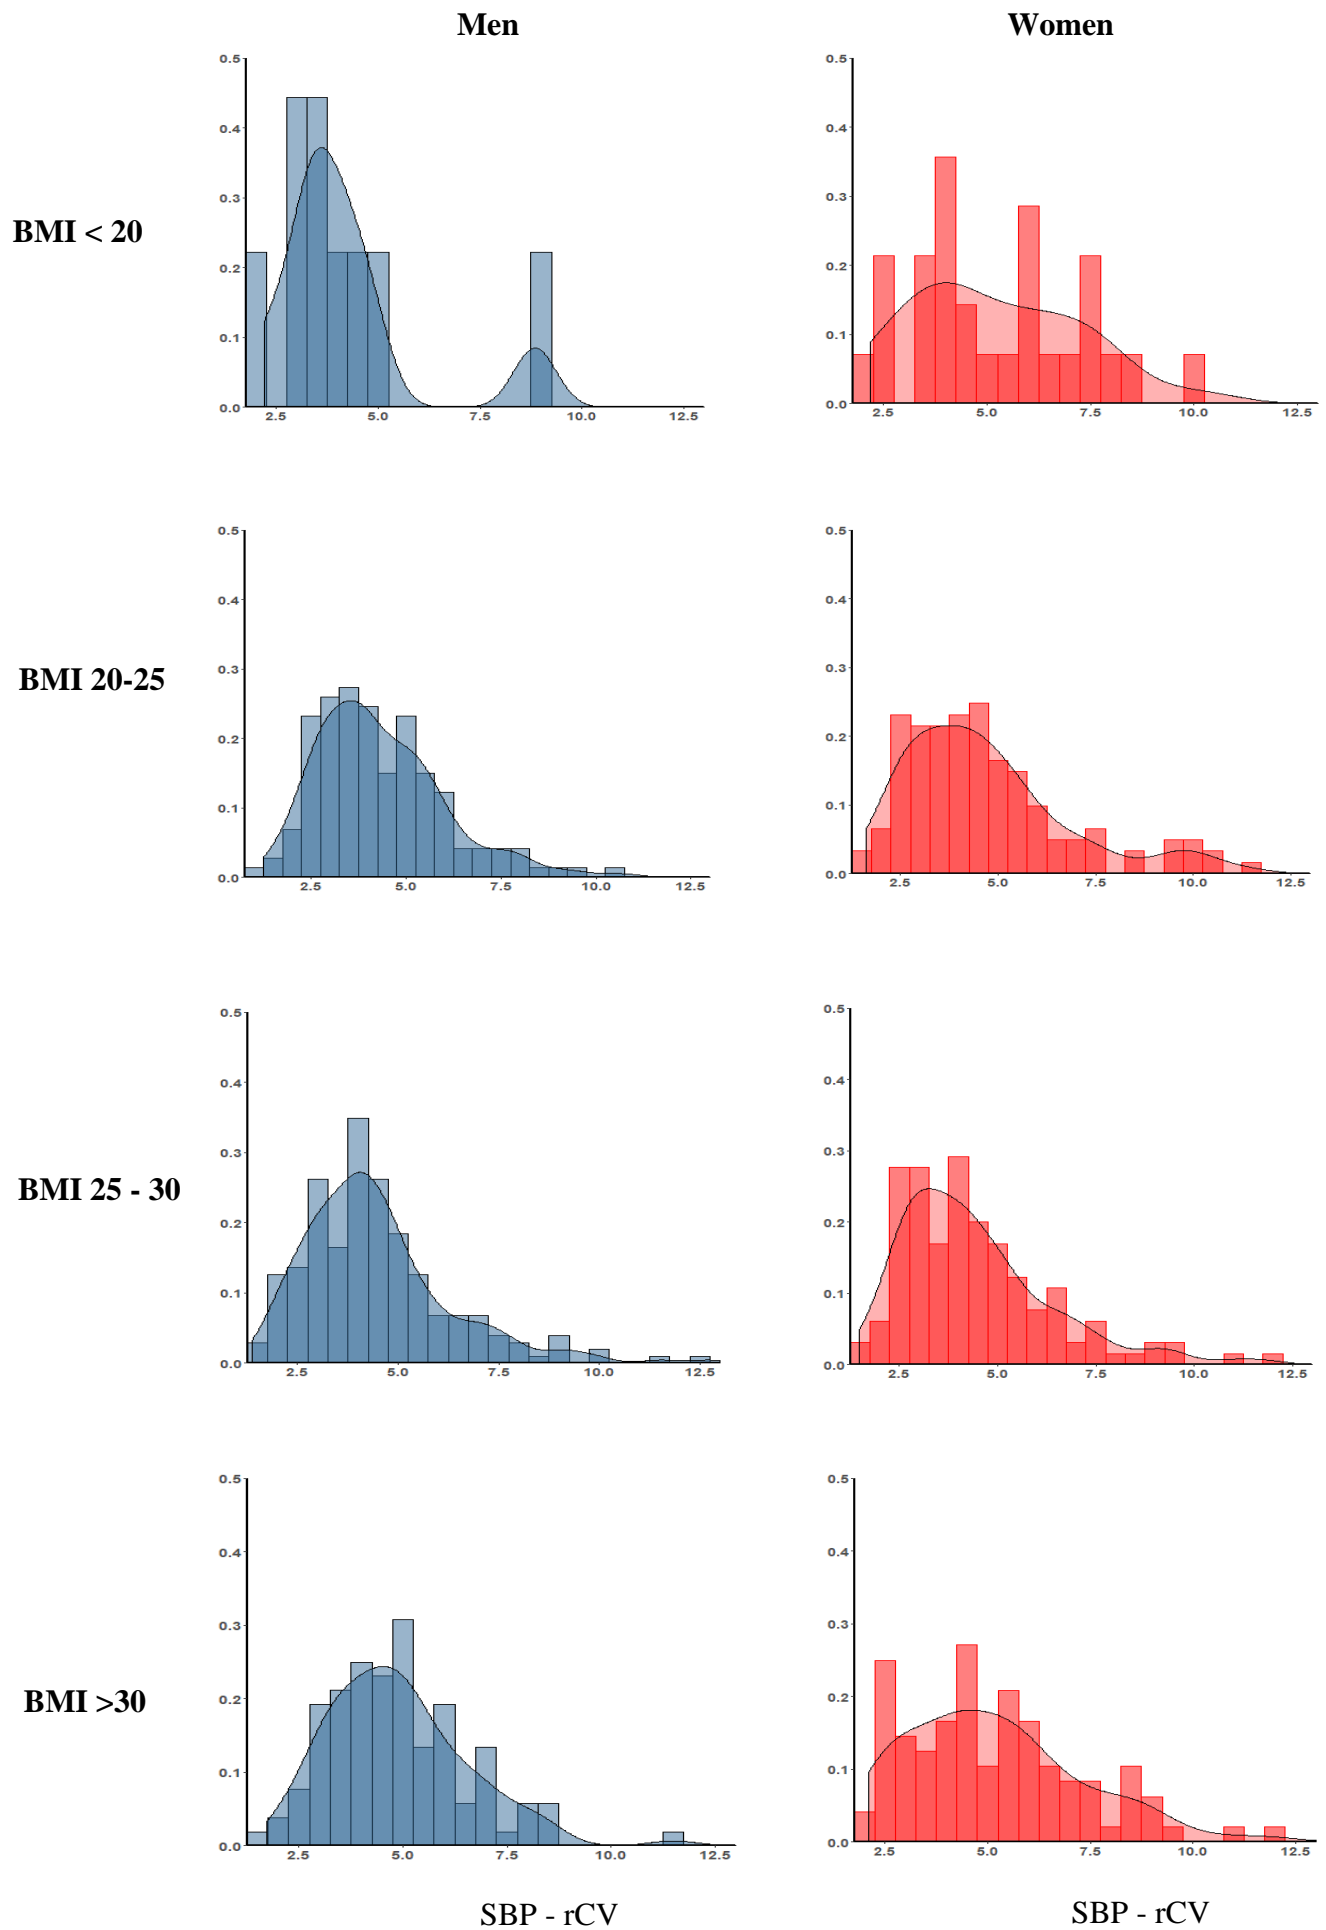

Supplement: EMS119265-supplement-Supplemental_Material.pdf [file EMS119265-supplement-Supplemental_Material.pdf]
